# Supplementary material
Source: publisher site journal article supplement (https://www.dovepress.com/article/413961)
Supplement: Supplementary file 1 [file get_supplementary_file.php]

Supplementary Information 1: CONSORT 2010 checklist of information to include when reporting a pilot or feasibility trial*


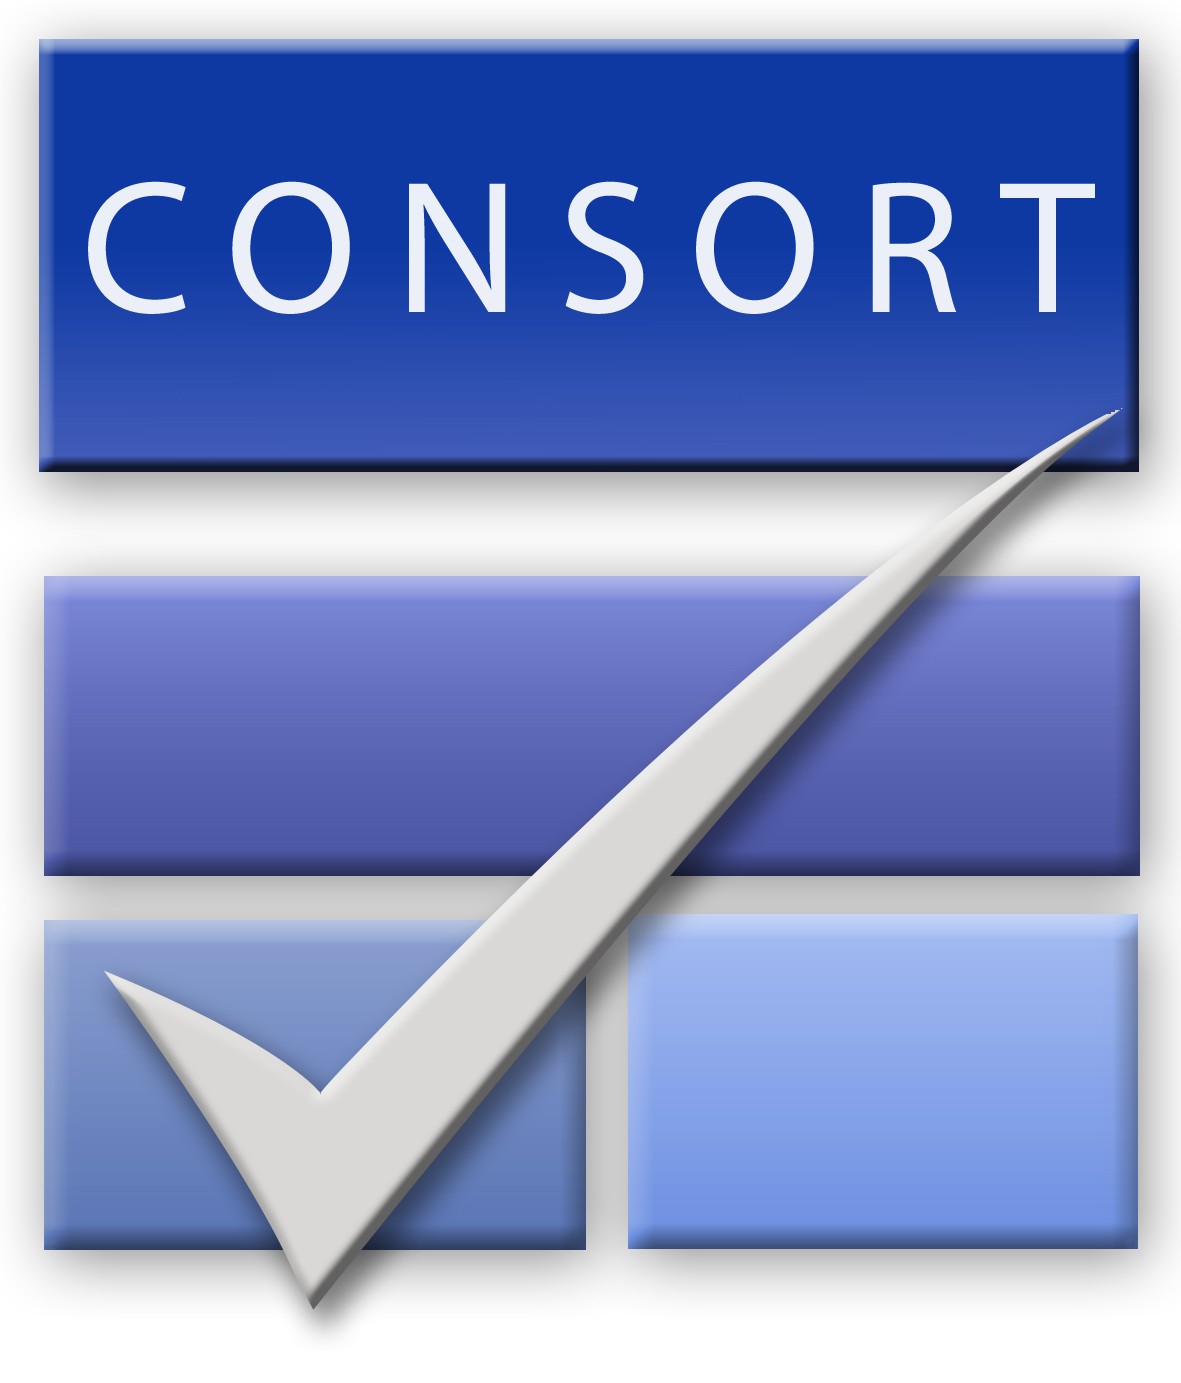


| Section/Topic | Item No | Checklist item | Reported on page No |
| --- | --- | --- | --- |
| Title and abstract | | | |
|  | 1a | Identification as a pilot or feasibility randomised trial in the title | 1 |
| 1b | Structured summary of pilot trial design, methods, results, and conclusions (for specific guidance see CONSORT abstract extension for pilot trials) | 3,4 |
| Introduction | | | |
| Background and objectives | 2a | Scientific background and explanation of rationale for future definitive trial, and reasons for randomised pilot trial | 6,7, |
| 2b | Specific objectives or research questions for pilot trial | 7,8 |
| Methods | | | |
| Trial design | 3a | Description of pilot trial design (such as parallel, factorial) including allocation ratio | 8 |
| 3b | Important changes to methods after pilot trial commencement (such as eligibility criteria), with reasons |  |
| Participants | 4a | Eligibility criteria for participants | 9 |
| 4b | Settings and locations where the data were collected | 8,9 |
|  | 4c | How participants were identified and consented | 9,10 |
| Interventions | 5 | The interventions for each group with sufficient details to allow replication, including how and when they were actually administered | 11, 12 ,13 |
| Outcomes | 6a | Completely defined prespecified assessments or measurements to address each pilot trial objective specified in 2b, including how and when they were assessed | 15,16 |
| 6b | Any changes to pilot trial assessments or measurements after the pilot trial commenced, with reasons | N/A |
|  | 6c | If applicable, prespecified criteria used to judge whether, or how, to proceed with future definitive trial | 16 |
| Sample size | 7a | Rationale for numbers in the pilot trial | 17 , pre published protocol |
| 7b | When applicable, explanation of any interim analyses and stopping guidelines | N/A |
| Randomisation: |  |  |  |
| Sequence  Generation | 8a | Method used to generate the random allocation sequence | 10 |
| 8b | Type of randomisation(s); details of any restriction (such as blocking and block size) | 10 |
| Allocation  concealment  mechanism | 9 | Mechanism used to implement the random allocation sequence (such as sequentially numbered containers), describing any steps taken to conceal the sequence until interventions were assigned | 10 |
| Implementation | 10 | Who generated the random allocation sequence, who enrolled participants, and who assigned participants to interventions | 10,11 |
| Blinding | 11a | If done, who was blinded after assignment to interventions (for example, participants, care providers, those assessing outcomes) and how | 10 |
| 11b | If relevant, description of the similarity of interventions | 11,12 |
| Statistical methods | 12 | Methods used to address each pilot trial objective whether qualitative or quantitative | 15,16,17 |
| Results | | | |
| Participant flow (a diagram is strongly recommended) | 13a | For each group, the numbers of participants who were approached and/or assessed for eligibility, randomly assigned, received intended treatment, and were assessed for each objective | Figure 2 |
| 13b | For each group, losses and exclusions after randomisation, together with reasons | Figure 2 |
| Recruitment | 14a | Dates defining the periods of recruitment and follow-up | 17,18 |
| 14b | Why the pilot trial ended or was stopped | 17 |
| Baseline data | 15 | A table showing baseline demographic and clinical characteristics for each group | Table 4 |
| Numbers analysed | 16 | For each objective, number of participants (denominator) included in each analysis. If relevant, these numbers  should be by randomised group | Figure 2 |
| Outcomes and estimation | 17 | For each objective, results including expressions of uncertainty (such as 95% confidence interval) for any  estimates. If relevant, these results should be by randomised group | 8 |
| Ancillary analyses | 18 | Results of any other analyses performed that could be used to inform the future definitive trial | 18 |
| Harms | 19 | All important harms or unintended effects in each group (for specific guidance see CONSORT for harms) |  |
|  | 19a | If relevant, other important unintended consequences | N/A |
| Discussion | | | |
| Limitations | 20 | Pilot trial limitations, addressing sources of potential bias and remaining uncertainty about feasibility | 25,26 |
| Generalisability | 21 | Generalisability (applicability) of pilot trial methods and findings to future definitive trial and other studies | 26 |
| Interpretation | 22 | Interpretation consistent with pilot trial objectives and findings, balancing potential benefits and harms, and  considering other relevant evidence | 24,25,26 |
|  | 22a | Implications for progression from pilot to future definitive trial, including any proposed amendments | 26,27 |
| Other information | | |  |
| Registration | 23 | Registration number for pilot trial and name of trial registry | 8 |
| Protocol | 24 | Where the pilot trial protocol can be accessed, if available | 2,8 |
| Funding | 25 | Sources of funding and other support (such as supply of drugs), role of funders | 27,28 |
|  | 26 | Ethical approval or approval by research review committee, confirmed with reference number | 8 |

Citation: Eldridge SM, Chan CL, Campbell MJ, Bond CM, Hopewell S, Thabane L, et al. CONSORT 2010 statement: extension to randomised pilot and feasibility trials. BMJ. 2016;355.

*We strongly recommend reading this statement in conjunction with the CONSORT 2010, extension to randomised pilot and feasibility trials, Explanation and Elaboration for important clarifications on all the items. If relevant, we also recommend reading CONSORT extensions for cluster randomised trials, non-inferiority and equivalence trials, non-pharmacological treatments, herbal interventions, and pragmatic trials. Additional extensions are forthcoming: for those and for up to date references relevant to this checklist, see [www.consort-statement.org](http://www.consort-statement.org).**Supplementary Table 1**

**Usual Care group assessments in Emergency Department**

| Participant number | ED Doctor | Physiotherapist | Occupational Therapist | Medical Social Worker |
| --- | --- | --- | --- | --- |
| 1 | √ | 0 | √ | √ |
| 2 | √ | 0 | 0 | 0 |
| 3 | √ | 0 | 0 | 0 |
| 4 | √ | √ | √ | 0 |
| 5 | √ | √ | 0 | 0 |
| 6 | √ | √ | 0 | 0 |
| 7 | √ | √ | √ | 0 |
| 8 | √ | √ | 0 | 0 |
| 9 | √ | 0 | 0 | 0 |
| 10 | √ | √ | 0 | 0 |
| Total | 10 | 6 | 3 | 1 |

**Abbreviations:**

ED: Emergency Department

√: Assessed by an ED doctor/Physiotherapist/Medical Social Worker

0: Not assessed

**Supplementary Table 2**

**CGA-only group assessments in Emergency Department**

| Participant number | SpR Geriatrics | Physiotherapist | Occupational Therapist | Medical Social Worker |
| --- | --- | --- | --- | --- |
| 1 | √ | 0 | √ | 0 |
| 2 | √ | 0 | √ | 0 |
| 3 | √ | 0 | √ | √ |
| 4 | √ | 0 | √ | √ |
| 5 | √ | 0 | √ | 0 |
| 6 | √ | √ | 0 | 0 |
| 7 | √ | 0 | √ | √ |
| 8 | √ | √ | 0 | √ |
| 9 | √ | √ | 0 | √ |
| Total | 9 | 3 | 6 | 5 |

**Abbreviations:**

ED: Emergency Department

SpR: Specialist Registrar

√: Assessed by an ED doctor/Physiotherapist/Medical Social Worker

0: Not assessed

**Supplementary Table 3**

**Components of ED PLUS**

| **ADMINISTRATION TIMELINE** | **PERSONNEL** | **DESCRIPTION** |
| --- | --- | --- |
| **Week 1** | An ED CGA was completed by Specialist Registrar in Geriatrics.  Physiotherapist visited the patient in their home within 24 hours of discharge from the ED | CGA was completed which involved comprehensive medical assessment, investigations, treatment recommendation and planned follow up.  Physiotherapy assessment and action plan including individualized goal setting based on the CGA conducted in the ED and the physiotherapy assessment. The physiotherapist performed an assessment of gait, balance, upper and lower limb strength assessment, assesses the patients ability to function independently as well as an environmental assessment. |
| Week 2 | Medication assessment and medication action plan  Via telephone  Physiotherapist via telephone call | The geriatrician assessed the medication the patient was taking as make recommendations for tapering of medication and cessation, follow up on Bone Health assessment.  Physiotherapist advised on progression of the patient’s functional goals, discussed medication with the Specialist Registrar in Geriatrics and public health nurse (PHN), GP and any other HSCP involved in patient’s care. |
| Week 3 | Nutritional assessment with a dietitian via telephone.  Physiotherapist via telephone call | Nutritional status was determined and a nutritional care plan will be implemented.  Physiotherapist advised on progressions of exercise programme as appropriate with liaison with patients, GP, PHN and Bone Health Assessment. |
| Week 4 | Physiotherapist visited the patient’s home | The physiotherapist reassessed the patient and progressed as appropriate dependent on the assessment, with support provided to follow on care. |
| Week 5 | Occupational Therapist via telephone  Physiotherapist via telephone call | The occupational therapist (OT) discussed with the patient regarding self-management based on the individual goals set by the patient and physiotherapist.  Physiotherapist advised on progressions of exercise programme as appropriate and assisted with referrals to other healthcare professionals as necessary. |
| Week 6 | Physiotherapist visited the patient’s home to conclude the sessions with a focus on review of patient goals and action plan to follow. | Input from all ED PLUS was collated for each patient to conclude their ED PLUS management, with letters sent to their GP and other healthcare professionals for follow on care. |

**Supplementary Information 2**

**ED PLUS Intervention characteristics**

| **ED PLUS assessment and intervention** |  |
| --- | --- |
| Subjective assessment | - Detailed information gathering from patient regarding nature of presenting complaint - Past medical history and impact of condition(s) on functional status and psychosocial well-being and QoL - Healthcare utilisation and formal/informal support network in place - Detailed history of baseline functional and mobility status; multifactorial falls history; use of telecommunications in the home - Goals for function, QoL once at home |
| Objective assessment | Observation   - Levels of alertness and/or pain - Signs of deformity - Naturalistic assessment of older adult in their home, ability to function in home, correct use of mobility aids, adaptations,   Cognition   - Assess with 4AT in the home   Physical   - Palpation of affected area (if limb injury) and assessment of pain - Assessment of active and passive range of motion of all limbs - Assessment of strength (manual muscle testing), sensation, coordination, reflexes. More detailed neurological assessment completed, if indicated   Function-focused measures   - Assessment of functional transfers and mobility. Stairs assessment completed, as indicated - Balance: Timed Up and Go, Single Leg Stand, Berg Balance - Activities of daily living (ADL): assessment of personal ADLS within home environment   Psychosocial   - Screening |
| Evaluation | Thorough analysis of all subjective and objective findings, as well as detail from CGA completed in ED. Discussion with the older adults regarding their goals and setting up of an intervention plan. |
| Intervention | Interventions typically employed included;   - Education re: activity modification and self management strategies - Provision of a written Home Exercise Programmes with a practice run of the exercise program (Strength regime, improvement of range of motion, functional tasks, - Family and carer education, as indicated - Shared decision making with patient regarding care planning e.g. application for home supports and onward referrals to primary care services if required - Exercise prescription was individualised to each patient, and was based on intended outcome (e.g., improvement in fitness or functional status or disease treatment). - Multicomponent programmes which include balance and strength exercise - Prescription of a physical activity with a discussion with the older adult   Discussion with EM team and shared decision-making regarding proposed interdisciplinary discharge plan |

**Supplementary Table 4 Economic Evaluation**

To create the ED PLUS team, one clinical specialist physiotherapist, one senior occupational therapist, one staff grade dietician were allocated to work in conjunction with a SpR in Geriatrics. To calculate cost related to the healthcare use, the following table indicated the unit cost identified.

| **ROLE** | **ED PLUS HOURS PER PATIENT** | **GROSS SALARY** | **WEEKLY** | **RATE PER HOUR** | PER PATIENT | TOTAL (N=9) |
| --- | --- | --- | --- | --- | --- | --- |
| Clinical Specialist Physiotherapist (HSE scale-max scale) | 5 | €73,745.00 | €1,418.17 | €40.51 | €202.59 | €1,823.36 |
| Senior Occupational Therapist (HSE scale -max scale) | 2 | €64,380.00 | €1,238.08 | €35.00 | €70.74 | €636.72 |
| Staff Dietitian (HSE scale max scale) | 2 | €54,569.00 | €1,094.40 | €29.98 | €59.96 | €536.64 |
| Specialist Registrar Geriatrics (HSE scale-max scale) | 1 | €73,144.00 | €1,406.61 | €25.57 | €51.12 | €460.14 |
|  |  |  |  |  |  |  |
| Occupational Therapist and Dietitian 2 hours per ED PLUS patient |  |  |  |  |  |  |
| Clinical Specialist Physiotherapist 5 hours per ED PLUS patient |  |  |  |  |  |  |
| Specialist Registrar Geriatrics is paid 35.37 per hour, 2 hours on average across n=9. |  |  |  |  |  |  |
|  |  |  |  |  | Total Cost | €3,456.86 |

To determine whether ED PLUS represents value for money if implemented by the Irish health system, national guidance recommends that health gain be expressed as quality-adjusted life years (QALYs), and all costs relevant to a health and social care budget should be considered (Health Inquiry and Quality Authority 2020). To be considered cost effective, the incremental cost effectiveness ratio of ED PLUS plus usual ED care, compared to usual ED care alone, would need to demonstrate producing health gain for less than €45,000 per QALY.

**Reference:**

Health Inquiry and Quality Authority. Guidelines for the Economic Evaluation of Health Technologies in Ireland 2020. 2020.
